# Supplementary material for: A novel discharge–charge mechanism of a S–P2S5 composite electrode without electrolytes in all-solid-state Li/S batteries
Source: Royal Society of Chemistry journal article supplement (doi:10.1039/c7ta01481c), 2017-01-01
Supplement: c7ta01481c1.pdf [file c7ta01481c1.pdf]

**Experimental supplementary information (ESI) available: Details of cell  
preparation, characterization.**

**Experimental Methods**

**Cell preparation:** Ketjen black (KB, Lion Co.) was used as an electronic conductive additive.<sup>1</sup> Sulfur composite electrodes with KB and P<sub>2</sub>S<sub>5</sub> (S-KB-P<sub>2</sub>S<sub>5</sub>) were prepared by mechanical milling of the mixture of S<sub>8</sub> (Aldrich, 99.5%), KB and P<sub>2</sub>S<sub>5</sub> (Aldrich, 99%) with a weight ratio of 50 : 10 : 40. The rotation speed of disk and milling time were 370 rpm and 4 h.<sup>3</sup> All-solid-state Li/S cells with the S-KB-P<sub>2</sub>S<sub>5</sub> composite electrode were assembled. The S-KB-P<sub>2</sub>S<sub>5</sub> composite electrode (3 mg) as a working electrode and Li<sub>3</sub>PS<sub>4</sub> glass electrolyte<sup>4</sup> as a separator layer were set in a polycarbonate tube (Φ10 mm) and pressed together under 360 MPa. Li-In alloy as a counter and reference electrode was placed on the surface of the solid electrolyte side of the bilayer pellet and pressed the three-layered pellet under 120 MPa. The electrochemical performance of the cells was examined at the constant current density of 0.64 mA cm<sup>-2</sup> (0.1 C) at room temperature using a charge-discharge measuring device (VMP3, Bio-Logic Co.).

**Characterization:** <sup>31</sup>P magic-angle-spinning (MAS) NMR spectrum of the S-KB-P<sub>2</sub>S<sub>5</sub>

composite electrode is acquired at 160.26 MHz using a JEOL ECX-400 spectrometer, with a  $\Phi 4$  mm  $ZrO_2$  rotor at a 15 kHz spinning speed. The  $90^\circ$  pulse width and relaxation delay were 5  $\mu$ s and 10 s, respectively. The accumulated number was 2048. The  $^{31}P$  NMR spectra were referenced to external  $(NH_4)H_2PO_4$  at 1.33 ppm. FE-SEM observation and EDX mapping of the S-KB- $P_2S_5$  composite electrode are conducted at the acceleration voltage of 3 kV and 15 kV using FE-SEM (SU-8220, HITACHI). XRD measurements of S-KB- $P_2S_5$  composite electrodes before and after the discharge-charge tests were conducted using a diffractometer (SmartLab, Rigaku) with  $CuK\alpha$  radiation (40 kV, 200 mA). The existence of crystals in the S-KB- $P_2S_5$  composite electrodes after the discharge test was examined in detail by a transmission electron microscope (TEM, JEM- 2100F, JEOL) at an acceleration voltage of 200 kV. Electronic structures in the S-KB- $P_2S_5$  composite electrodes before and after the discharge-charge tests were analyzed by X-ray photoelectron spectroscopy (XPS, K-Alpha, Thermo Fisher Scientific) with a monochromatic  $AlK\alpha$  source (1486.6 eV). The observed binding energies were calibrated with the adventitious C1s peak to 284.7 eV or KB peak to 284.2 eV.

## References:

1. H. Nagata and Y. Chikusa, *J. Power Sources*, 2014, **264**, 206–210.

2. H. Nagata and Y. Chikusa, *Chem. Lett.*, 2014, **43**, 1333–1334.
3. H. Nagata and Y. Chikusa, *Energy Technol.*, 2014, **2**, 753.
4. K. Minami, A. Hayashi and M. Tatsumisago, *J. Ceram. Soc. JPN*, 2010, **118**, 305-308.
